# Supplementary material for: Epigenetic differences at the HTR2A locus in progressive multiple sclerosis patients
Source: PubMed Central journal article supplement (PMC7747721; doi:10.1038/s41598-020-78809-x), 2020-12-17
Supplement: 41598_2020_78809_MOESM1_ESM.pdf [file 41598_2020_78809_MOESM1_ESM.pdf]

## Epigenetic differences at the *HTR2A* locus in progressive multiple sclerosis patients

### SUPPLEMENTARY FIGURES/TABLES

Vicki E Maltby<sup>1, 2#</sup>, Rodney A Lea<sup>2, 3#</sup>, Sean Burnard<sup>2,4</sup>, Alexandre Xavier<sup>2,4</sup>, Thao Van Cao<sup>3</sup>  
Nicole White<sup>3</sup>, Daniel Kennedy<sup>3</sup>, Kira Groen<sup>1,2</sup>, Katherine A. Sanders<sup>2,5</sup>, Rebecca Seeto<sup>1,6</sup>,  
Samara Bray<sup>1,2</sup>, Melissa Gresle<sup>7,8,10</sup>, Louise Laverick<sup>7,8</sup>, Helmut Butzkueven<sup>9,10</sup>, Rodney J  
Scott<sup>4,11,12</sup>, Jeannette Lechner-Scott<sup>1,2,13\*</sup>

1. School of Medicine and Public Health, University of Newcastle, Callaghan NSW 2308, Australia
2. Centre for Brain and Mental Health, Hunter Medical Research Institute, New Lambton Heights NSW 2305, Australia
3. Institute of Health and Biomedical Innovations, Genomics Research Centre, Queensland University of Technology, Kelvin Grove QLD 4059, Australia
4. School of Biomedical Sciences and Pharmacy, University of Newcastle, Callaghan NSW 2308, Australia
5. Centre for Anatomical and Human Sciences, Hull York Medical School, Hull UK.
6. School of Environmental and Life Sciences, University of Newcastle, Callaghan, NSW, 2308, Australia
7. Department of Medicine, University of Melbourne, Melbourne VIC Australia.
8. Royal Melbourne Hospital, Melbourne VIC, Australia
9. Alfred Hospital, Melbourne VIC, Australia
10. MS and Neuroimmunology Unit, Central Clinical School, Monash University, Melbourne VIC, Australia
11. Division of Molecular Genetics, Pathology North, John Hunter Hospital, New Lambton Heights NSW 2305, Australia
12. Centre for Cancer Research, Hunter Medical Research Institute, New Lambton Heights NSW 2305, Australia
13. Department of Neurology, John Hunter Hospital, New Lambton Heights NSW 2305, Australia

# Supplementary Figures 1a

QC assessments on raw data for both cohorts. Beta density plots for discovery (panel A) and validation (panel B) cohorts with controls (green) and MS patients (orange). Multiple Dimensional Scaling (MDS) plots for discovery (panel C) and validation (panel D) cohorts) with controls (green) and MS patients (orange). Sex check plots for discovery (panel E) and validation (panel F) cohorts for female (pink) and male (blue).

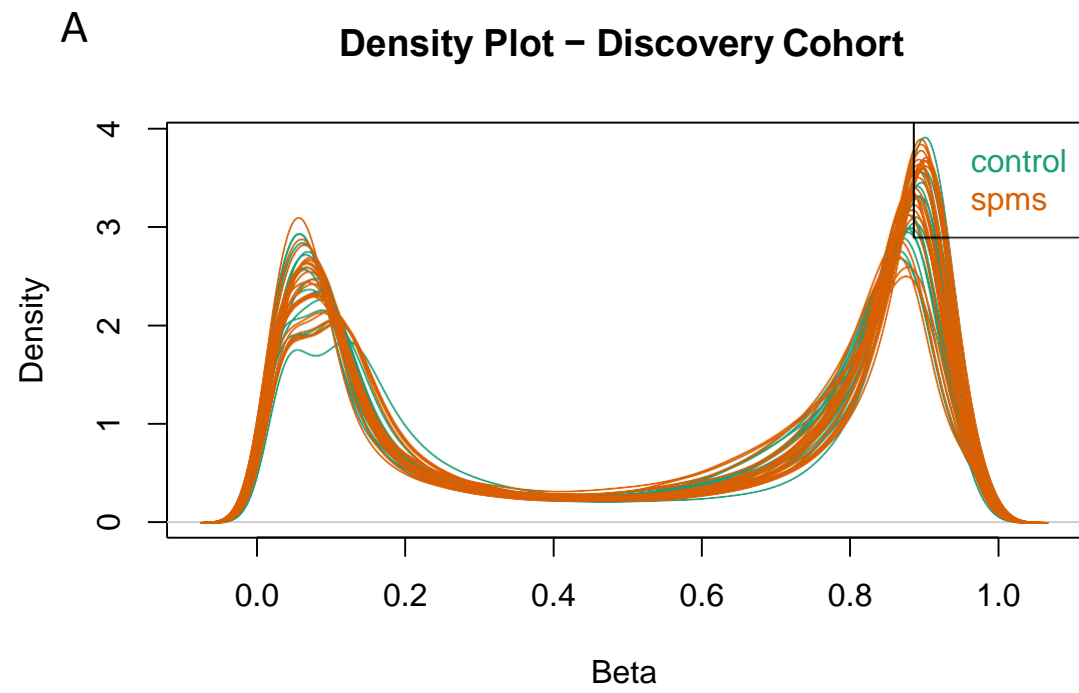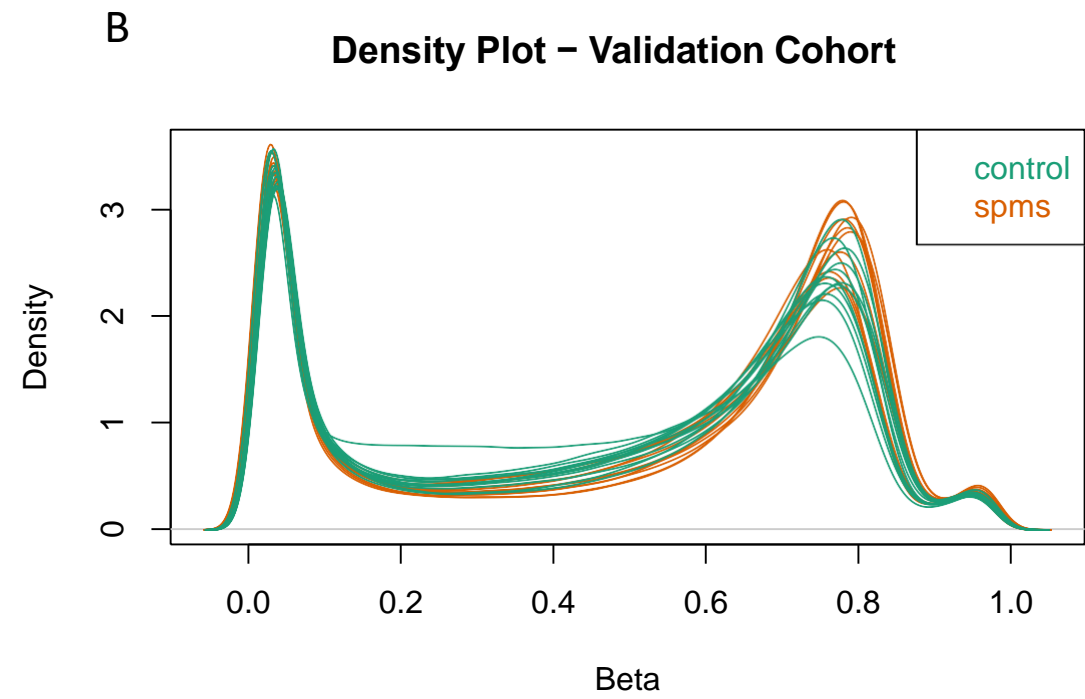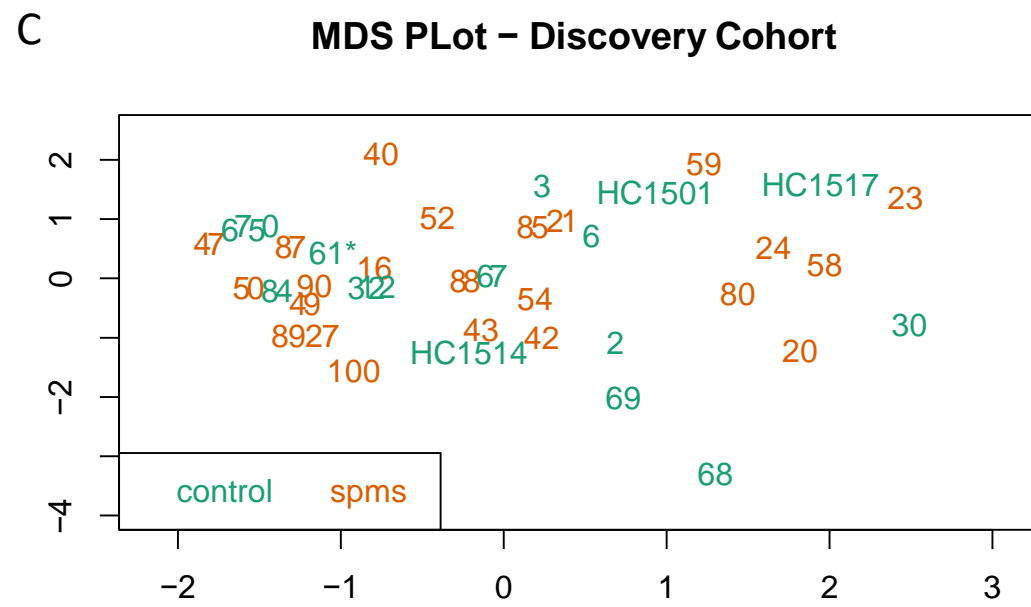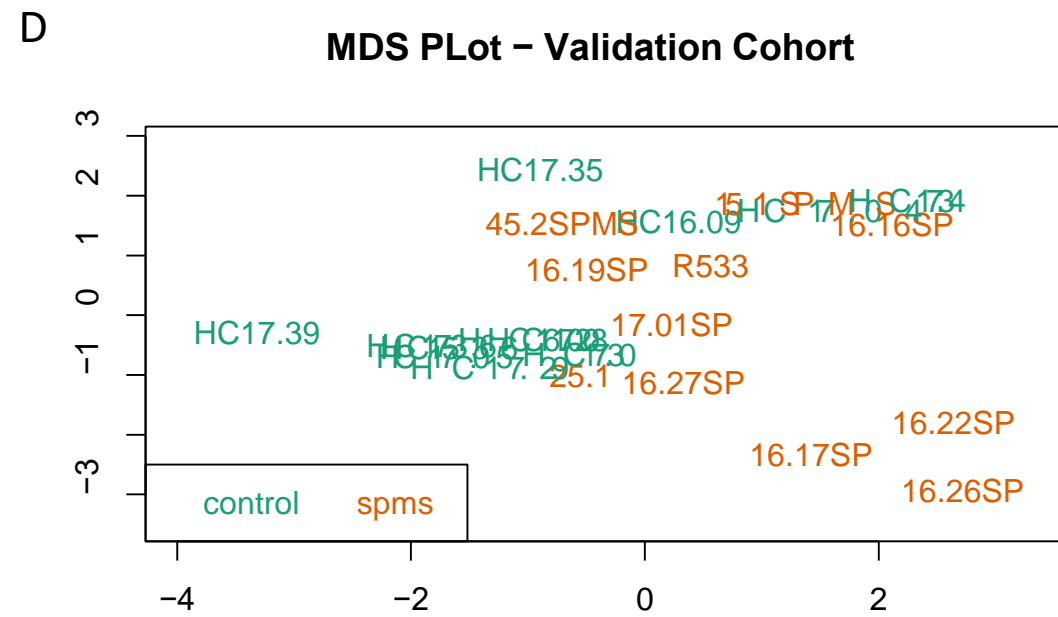

**E Sex Plot – Discovery Cohort**

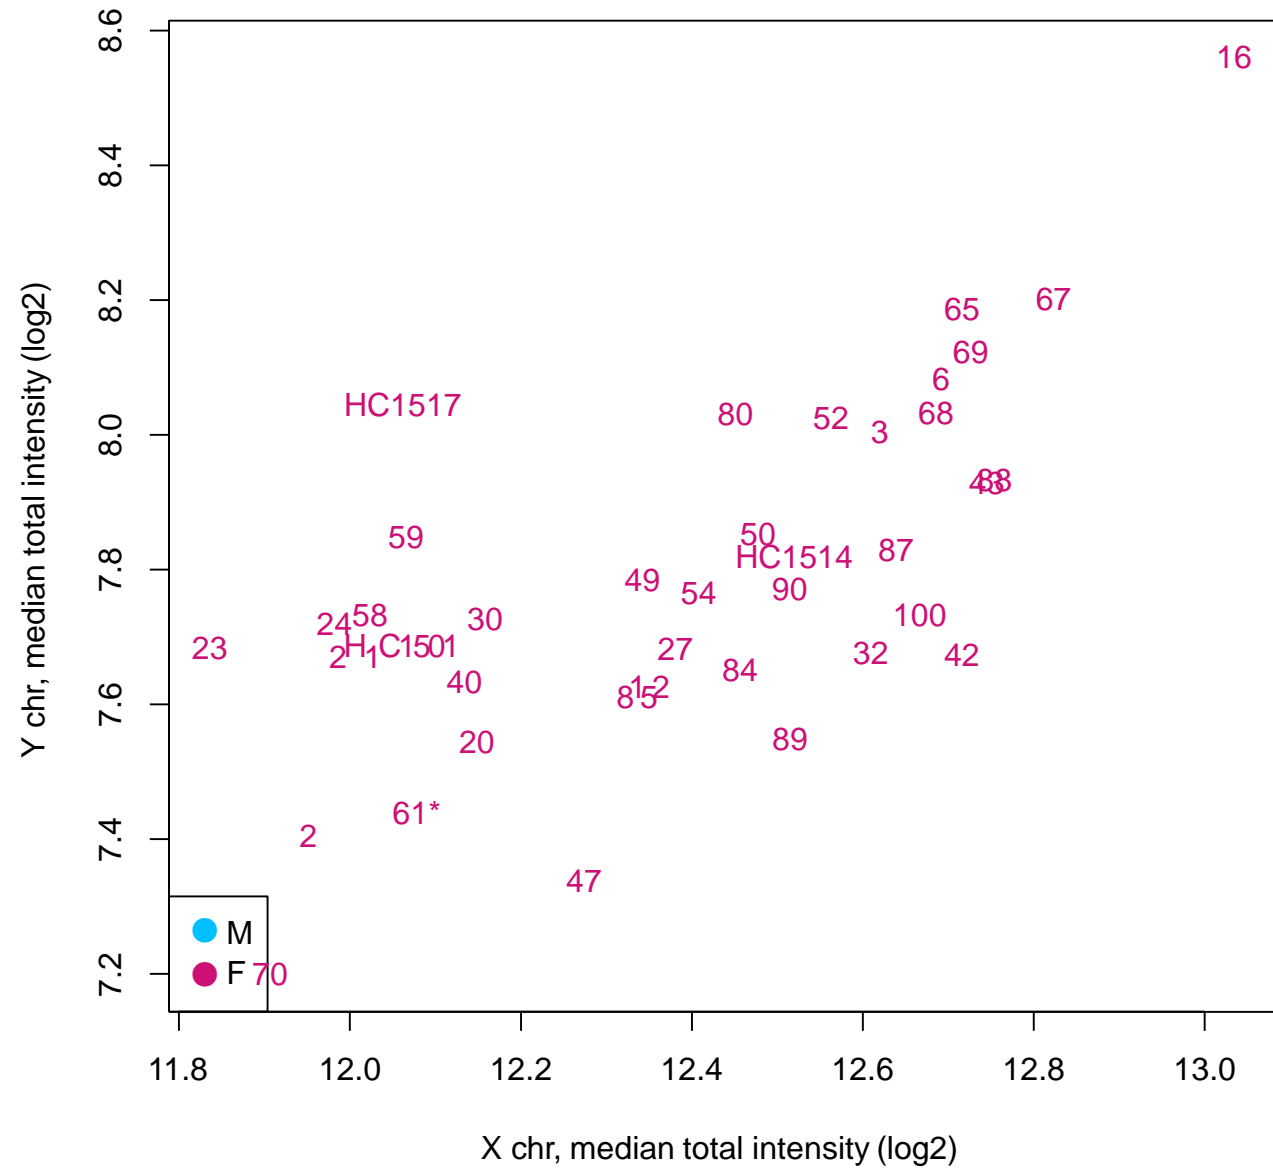

**F Sex Plot – Validation Cohort**

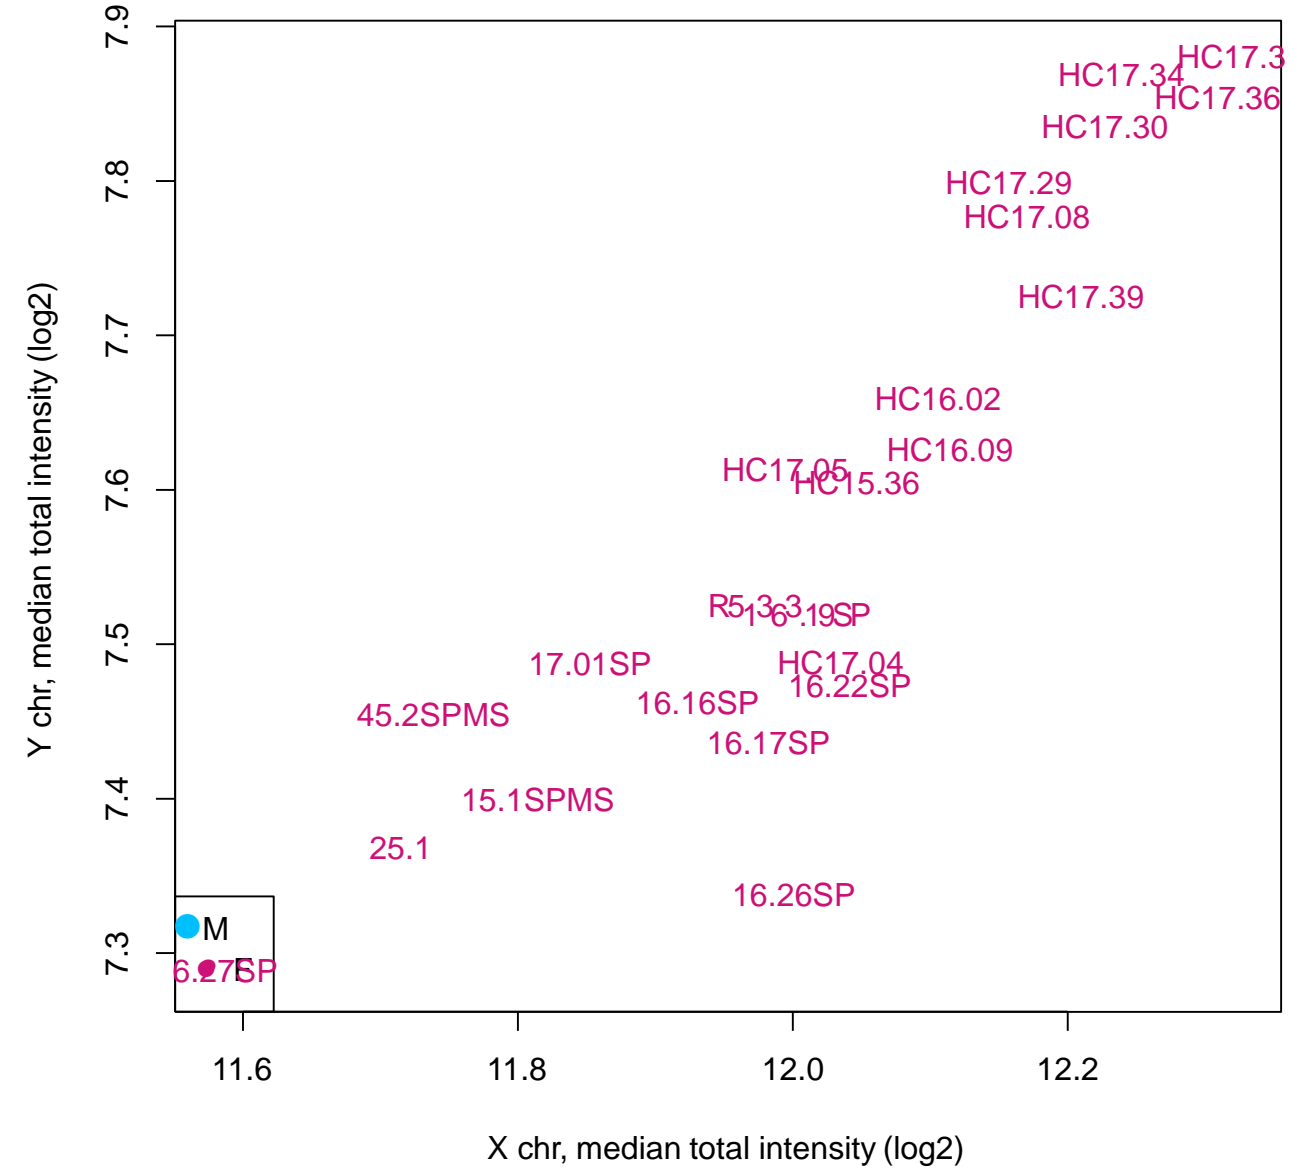

## Supplementary Files 1b

QC assessments on normalized data for both cohorts. Beta density plots for discovery (panel A) and validation (panel B) cohorts with controls (green) and MS patients (orange). Multiple Dimensional Scaling (MDS) plots for discovery (panel C) and validation (panel D) cohorts) with controls (green) and MS patients (orange).

A

Density Plot – Discovery cohort

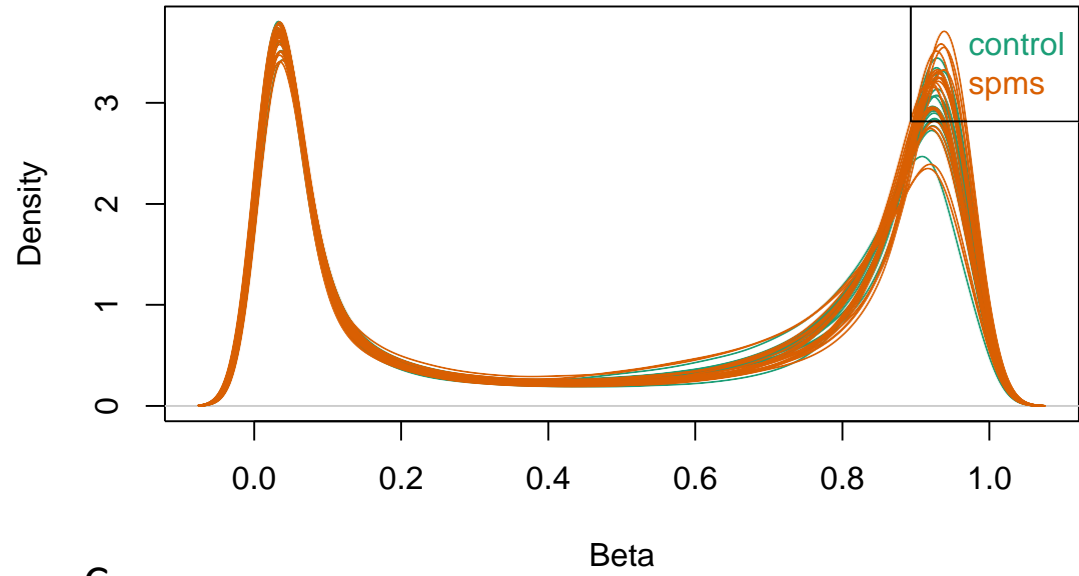

B

Density Plot – validation cohort

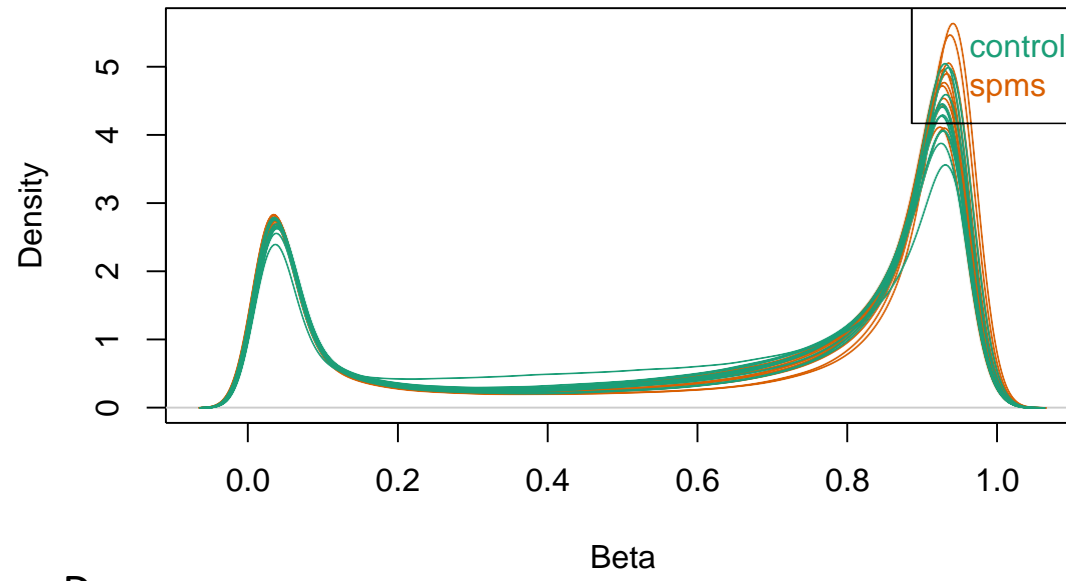

C

MDS Plot – Discovery Cohort

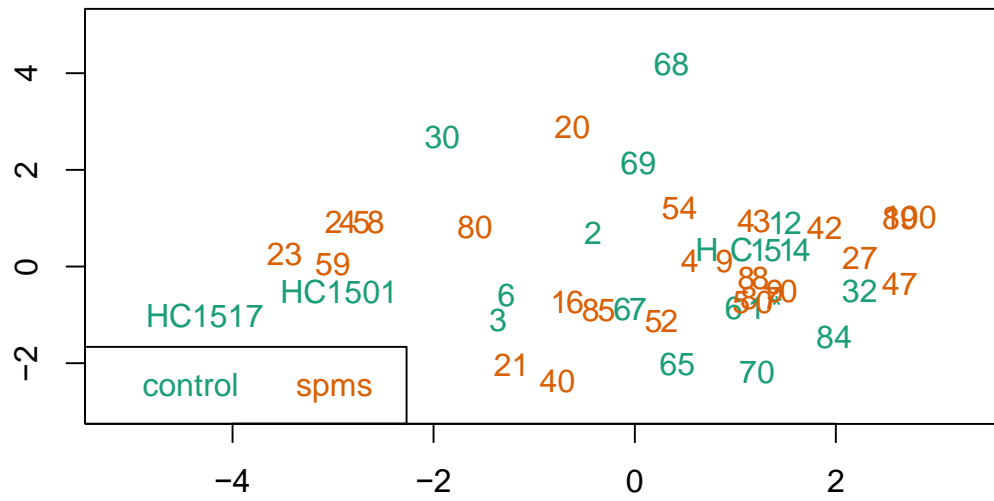

D

MDS Plot – Validation Cohort

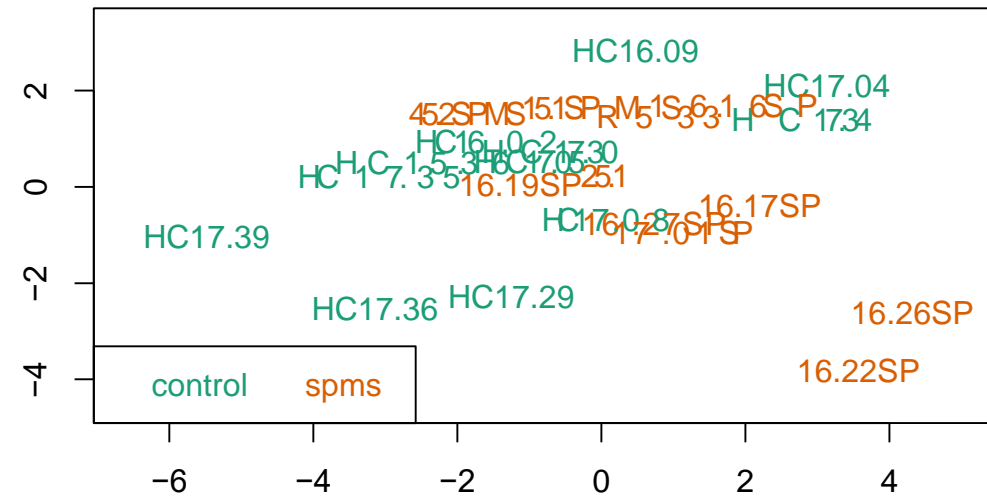

# Supplementary Files 2

Batch effect analysis for both cohorts combined left panel is before correction, right panel shows batch effects post corrections

### Singular Value Decomposition Analysis (SVD)

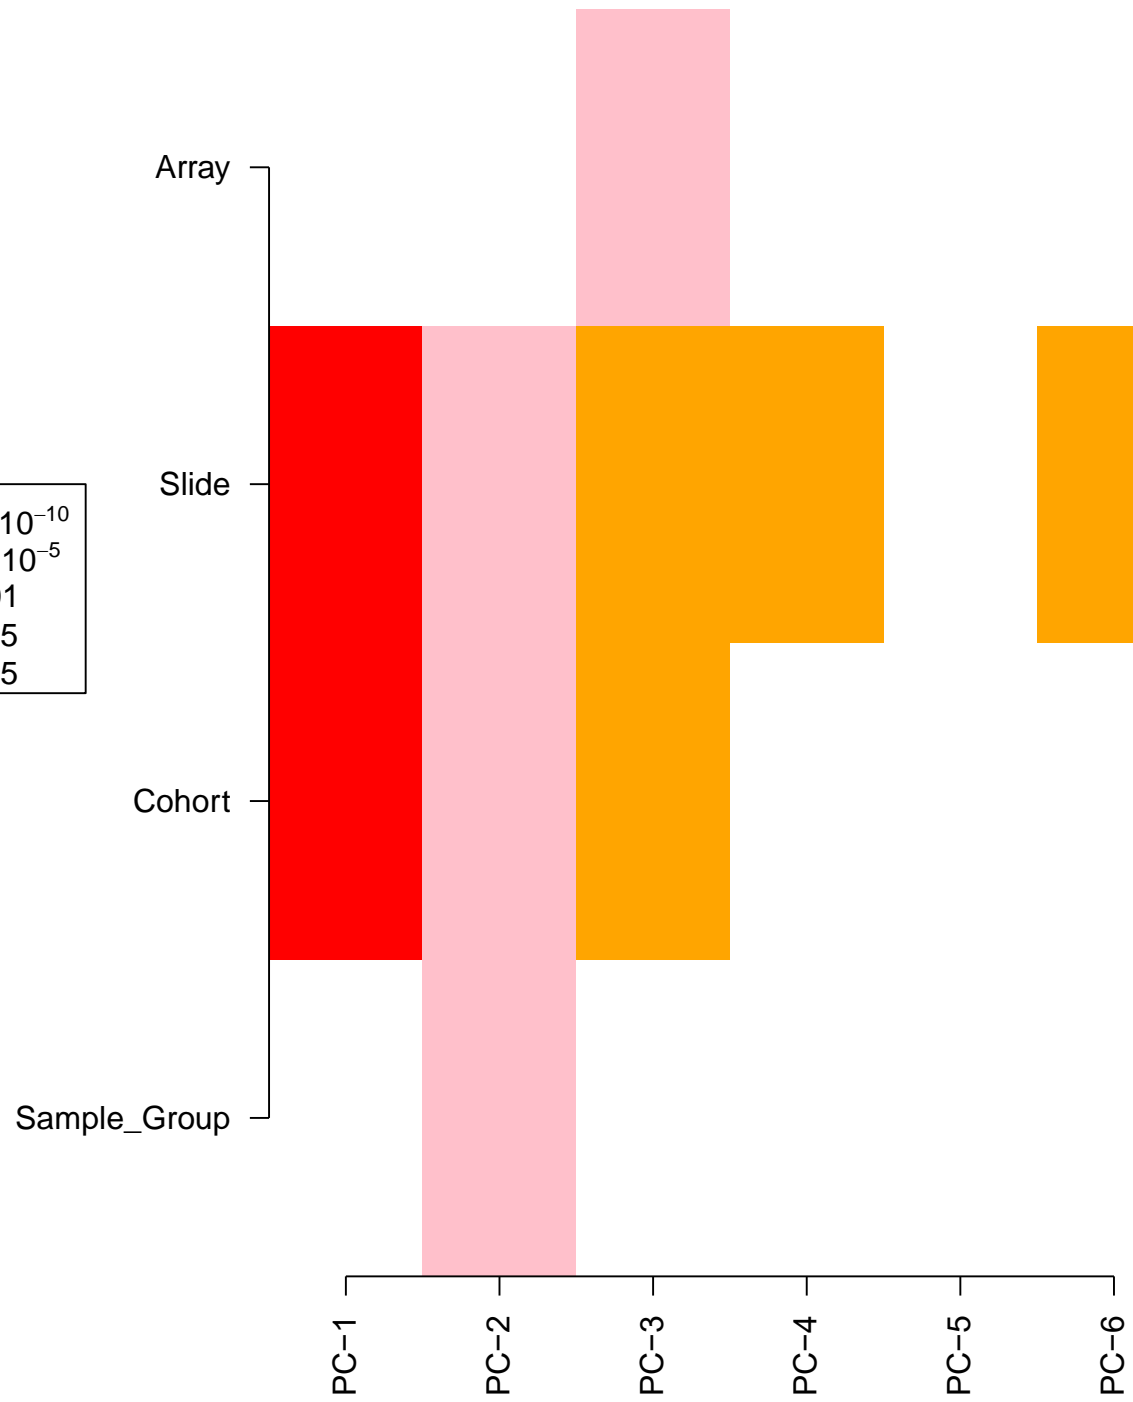

### Singular Value Decomposition Analysis (SVD)

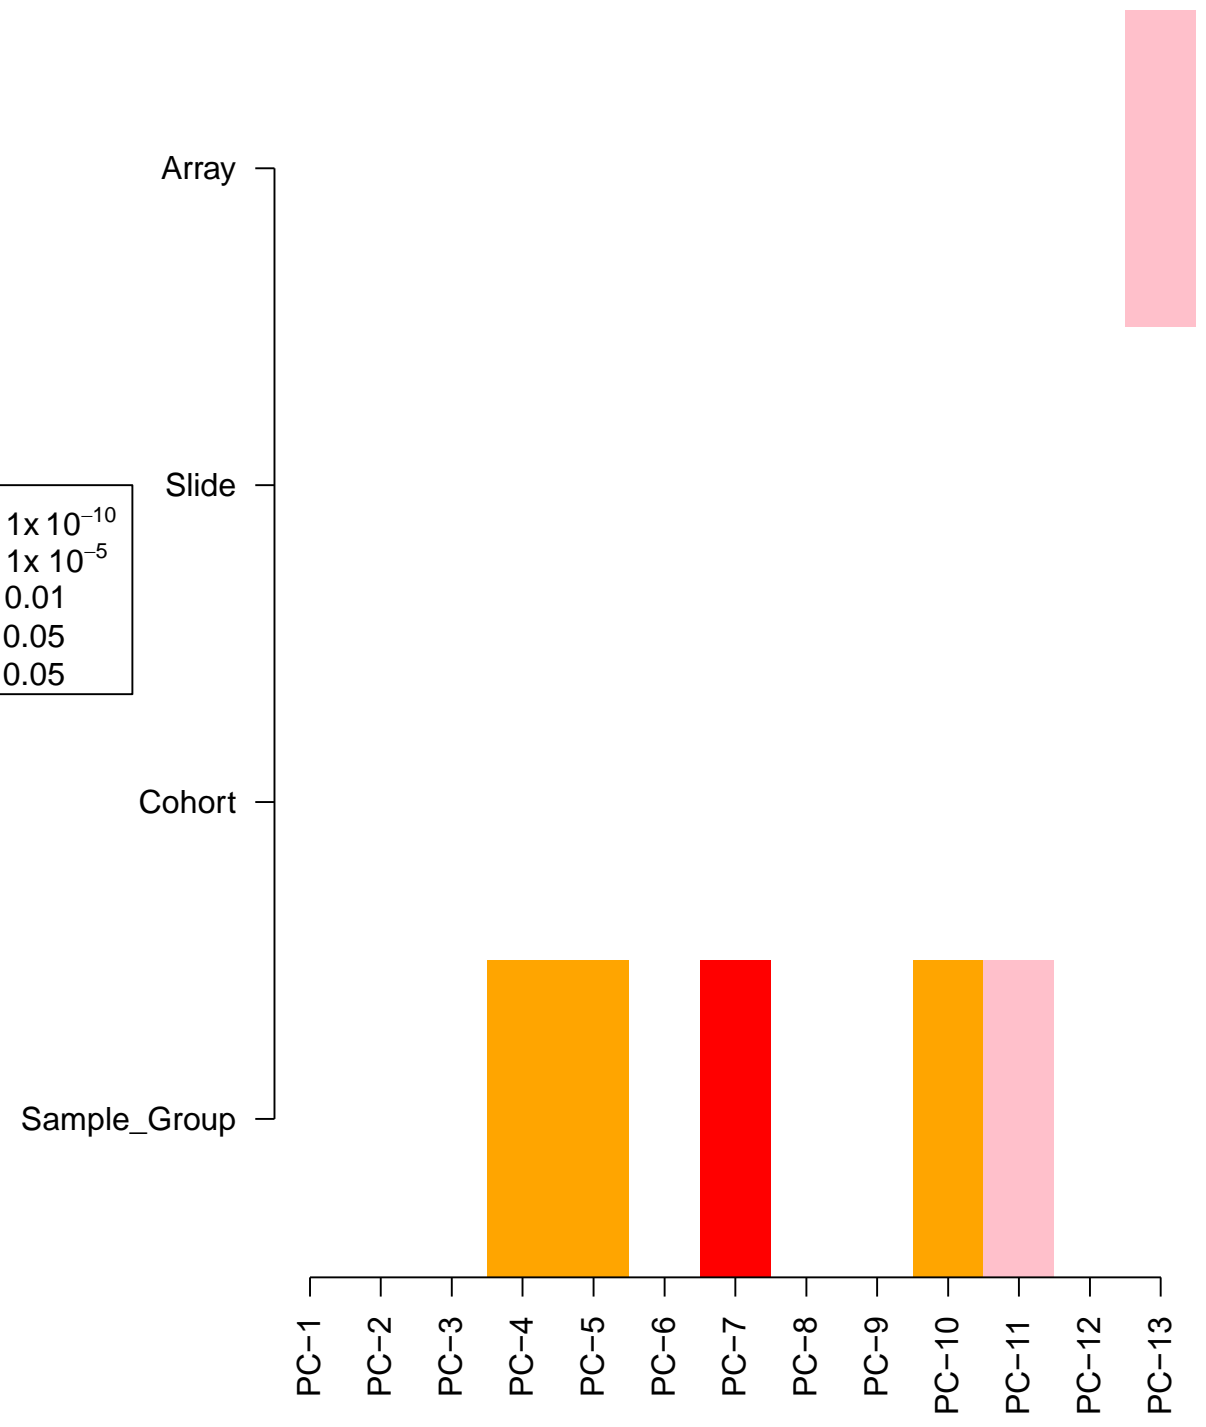



Supplementary Table 3 HTR2A CpG Correlation matrix

|            |                     | Correlations |            |            |            |            |            |            |            |
|------------|---------------------|--------------|------------|------------|------------|------------|------------|------------|------------|
|            |                     | cg01620540   | cg06020661 | cg09798090 | cg18200810 | cg24118521 | cg23881368 | cg05506829 | cg07075299 |
| cg01620540 | Pearson Correlation | 1            | .895**     | .890**     | .887**     | .883**     | .866**     | .859**     | .892**     |
|            | Sig. (2-tailed)     |              | .000       | .000       | .000       | .000       | .000       | .000       | .000       |
|            | N                   | 35           | 35         | 35         | 35         | 35         | 35         | 35         | 35         |
| cg06020661 | Pearson Correlation | .895**       | 1          | .988**     | .976**     | .978**     | .980**     | .972**     | .926**     |
|            | Sig. (2-tailed)     | .000         |            | .000       | .000       | .000       | .000       | .000       | .000       |
|            | N                   | 35           | 35         | 35         | 35         | 35         | 35         | 35         | 35         |
| cg09798090 | Pearson Correlation | .890**       | .988**     | 1          | .980**     | .975**     | .977**     | .967**     | .915**     |
|            | Sig. (2-tailed)     | .000         | .000       |            | .000       | .000       | .000       | .000       | .000       |
|            | N                   | 35           | 35         | 35         | 35         | 35         | 35         | 35         | 35         |
| cg18200810 | Pearson Correlation | .887**       | .976**     | .980**     | 1          | .987**     | .985**     | .976**     | .919**     |
|            | Sig. (2-tailed)     | .000         | .000       | .000       |            | .000       | .000       | .000       | .000       |
|            | N                   | 35           | 35         | 35         | 35         | 35         | 35         | 35         | 35         |
| cg24118521 | Pearson Correlation | .883**       | .978**     | .975**     | .987**     | 1          | .988**     | .976**     | .933**     |
|            | Sig. (2-tailed)     | .000         | .000       | .000       | .000       |            | .000       | .000       | .000       |
|            | N                   | 35           | 35         | 35         | 35         | 35         | 35         | 35         | 35         |
| cg23881368 | Pearson Correlation | .866**       | .980**     | .977**     | .985**     | .988**     | 1          | .979**     | .923**     |
|            | Sig. (2-tailed)     | .000         | .000       | .000       | .000       | .000       |            | .000       | .000       |
|            | N                   | 35           | 35         | 35         | 35         | 35         | 35         | 35         | 35         |
| cg05506829 | Pearson Correlation | .859**       | .972**     | .967**     | .976**     | .976**     | .979**     | 1          | .909**     |
|            | Sig. (2-tailed)     | .000         | .000       | .000       | .000       | .000       | .000       |            | .000       |
|            | N                   | 35           | 35         | 35         | 35         | 35         | 35         | 35         | 35         |
| cg07075299 | Pearson Correlation | .892**       | .926**     | .915**     | .919**     | .933**     | .923**     | .909**     | 1          |
|            | Sig. (2-tailed)     | .000         | .000       | .000       | .000       | .000       | .000       | .000       |            |
|            | N                   | 35           | 35         | 35         | 35         | 35         | 35         | 35         | 35         |

\*\* . Correlation is significant at the 0.01 level (2-tailed).

Supplementary Table 4

| Present_in | SNP       | BP       | SPMS    |         |         |        | RRMS    |         |        |        |
|------------|-----------|----------|---------|---------|---------|--------|---------|---------|--------|--------|
|            |           |          | F_A.CD4 | F_U.CD4 | P.CD4   | OR.CD4 | F_A.CD4 | F_U.CD4 | P.CD4  | OR.CD4 |
| CD4        | rs1328684 | 47466230 | 0.2273  | 0.5385  | 0.0104  | 0.2521 | 0.375   | 0.3235  | 0.6486 | 1.255  |
| CD4        | rs9534495 | 47429228 | 0.5     | 0.1923  | 0.01226 | 4.2    | 0.4583  | 0.4412  | 1      | 1.072  |
| Both       | rs1928042 | 47437216 | 0.1136  | 0.3846  | 0.0141  | 0.2051 | 0.2292  | 0.25    | 1      | 0.8919 |
| CD4        | rs732821  | 47472879 | 0.5455  | 0.2692  | 0.02826 | 3.257  | 0.4167  | 0.4118  | 1      | 1.02   |
| CD4        | rs6561336 | 47448060 | 0.5227  | 0.2692  | 0.04789 | 2.973  | 0.3958  | 0.3824  | 1      | 1.058  |
| Both       | rs4941573 | 47464857 | 0.5227  | 0.2692  | 0.04789 | 2.973  | 0.3958  | 0.3824  | 1      | 1.058  |
| CD4        | rs6313    | 47469940 | 0.5227  | 0.2692  | 0.04789 | 2.973  | 0.3958  | 0.3824  | 1      | 1.058  |
| CD4        | rs6311    | 47471478 | 0.5227  | 0.2692  | 0.04789 | 2.973  | 0.3958  | 0.3824  | 1      | 1.058  |
| Both       | rs4142900 | 47473550 | 0.5682  | 0.3077  | 0.04807 | 2.961  | 0.5     | 0.4412  | 0.6574 | 1.267  |
| CD4        | rs2760345 | 47438574 | 0.02273 | 0.1538  | 0.05979 | 0.1279 | 0.1042  | 0.1176  | 1      | 0.8721 |
| CD4        | rs1328685 | 47471890 | 0.02273 | 0.1538  | 0.05979 | 0.1279 | 0.125   | 0.1176  | 1      | 1.071  |
| CD4        | rs6314    | 47409034 | 0.1364  | 0       | 0.07767 | NA     | 0.02083 | 0.05882 | 0.5669 | 0.3404 |
| Both       | rs977003  | 47415001 | 0.5682  | 0.3462  | 0.08758 | 2.485  | 0.4167  | 0.4412  | 1      | 0.9048 |
